# Supplementary material for: Hierarchical cystine flower based electrochemical genosensor for detection of Escherichia coli O157:H7
Source: Royal Society of Chemistry journal article supplement (doi:10.1039/c4ra04511d), 2014-01-01
Supplement: c4ra04511d1.pdf [file c4ra04511d1.pdf]

### SUPPLEMENTARY INFORMATION

#### **Hierarchical Cystine Flower Based Electrochemical Genosensor for Detection of *Escherichia coli* O157:H7**

Chandra Mouli Pandey<sup>ab</sup>, Ida Tiwari<sup>b</sup>, Gajjala Sumana<sup>\*a</sup>

**Figure S1:** Cyclic voltammogram peak current analysis of of pDNA/CysFl/Au bioelectrode as a function of scan rate (10-300 mV/s). (A) Variation of current with square root of scan rate and (B) variation of potential with log of scan rate.

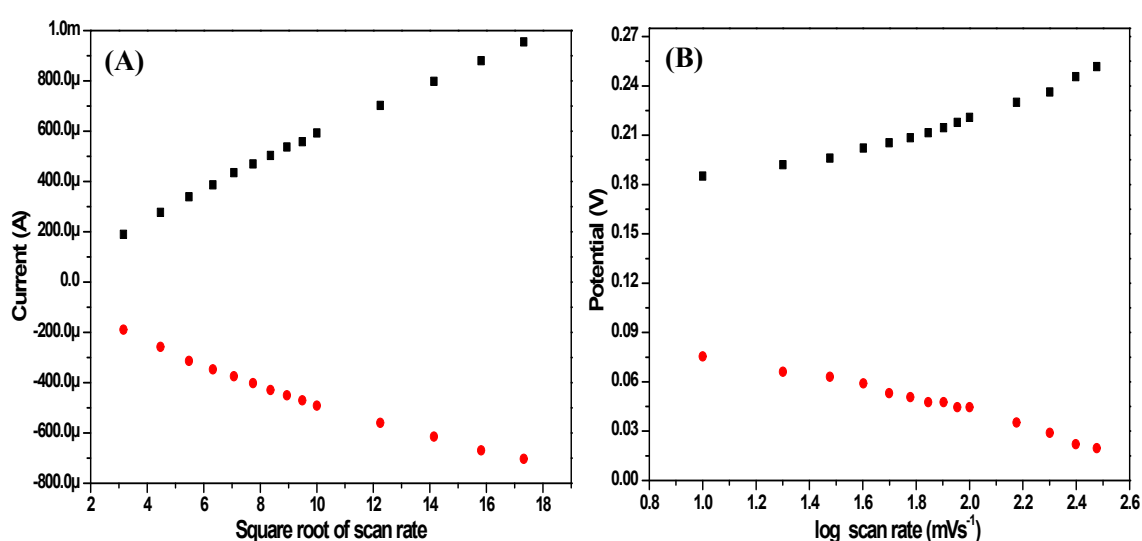

#### **3.6.2. Estimation of the association constant between cDNA and pDNA/CysNf/Au bioelectrode.**

The association constant ( $K_a$ ) for binding interaction was determined using the Langmuir isotherm approach in which the isotherm assumes equal binding energy for all binding sites. For  $K_a$  estimation, the change in  $R_{ct}$  was related to the binding of cDNA with immobilized pDNA and is represented by the following equation:

$$M = 1 - R_{ct}(pDNA)/R_{ct}(cDNA) \quad (1)$$

where  $M$ , is the number of occupied binding sites and  $R_{ct}(pDNA)$ ,  $R_{ct}(cDNA)$  represents the charge transfer resistance before and after hybridization with cDNA, respectively. In the Langmuir isotherm,  $M$  can be related to association constant using the following equation:

$$M = K_a C / (1 + K_a C) \quad (2)$$

$$K_a C = M / 1 - M \quad (3)$$

where  $K_a$  is the association constant and  $C$  is the concentration of molecules in the solution. From eqs 2 and 3 above

$$K_a C = R_{ct}(cDNA) - R_{ct}(pDNA) / R_{ct}(pDNA) \quad (4)$$

$$K_a C = \Delta R_{ct} / R_{ct}(pDNA) \quad (5)$$

Using eq 5, the curve was plotted between  $\Delta R_{ct}/R_{ct}(pDNA)$  and the concentration of cDNA (Fig. S2) and it was revealed that  $\Delta R_{ct}/R_{ct}(pDNA)$  varies linearly with the concentration and follows the linear equation

$$\Delta R_{ct}/R_{ct}(pDNA) = 3.5852 + 0.2432 \log cDNA \quad (6)$$

with a correlation coefficient of 0.998.  $K_a$  was estimated from the slope of the regression equation and found to be  $0.243 \text{ M}^{-1}$ .

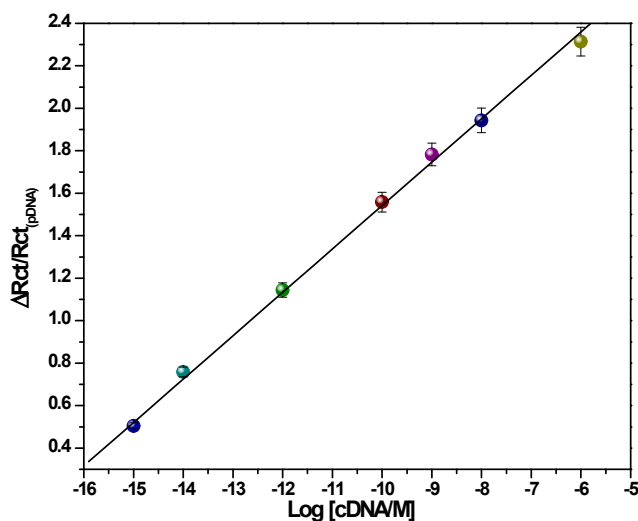

**Figure S2.** Linearity plot between  $\Delta R_{ct}/R_{ct}(pDNA)$  as a function of cDNA concentration ( $10^{-6}$ - $10^{-15}$  M) in 5 mM  $[\text{Fe}(\text{CN})_6]^{3-/4-}$  PBS solution at pH 7 for measurement of  $K_a$ .

**Table S1**

| S. No. | Bare gold<br>(°) | CysFI/Au<br>(°) | pDNA/CysFI/Au (°) |       |       |       |       |       |
|--------|------------------|-----------------|-------------------|-------|-------|-------|-------|-------|
|        |                  |                 | 2h                | 4h    | 6h    | 8h    | 12h   | 18h   |
| 1      | 97.96            | 54.95           | 42.46             | 31.21 | 29.65 | 29.13 | 28.98 | 28.42 |
| 2      | 97.92            | 55.03           | 42.35             | 30.98 | 29.02 | 29.23 | 29.08 | 28.93 |
| 3      | 97.83            | 54.69           | 41.98             | 30.95 | 29.38 | 28.82 | 29.12 | 28.63 |
| 4      | 97.90            | 54.83           | 42.42             | 30.89 | 29.68 | 29.20 | 29.18 | 29.22 |

**Table S1:** Variation in the contact angle of Au, CysFI/Au, and pDNA/CysFI/Au ODT/Au as a function of time.**Table S2**

| Sl. No | Electrode                          | Solution resistance<br>( $R_s$ , $\Omega$ ) | Charge transfer resistance<br>( $R_{ct}$ , $\Omega$ ) |
|--------|------------------------------------|---------------------------------------------|-------------------------------------------------------|
| 1      | CysFI/Au                           | 84.2                                        | 250.4                                                 |
| 2      | EDC/NHS activated CysFI/Au         | 24.0                                        | 16.7                                                  |
| 3      | pDNA/CysFI/Au                      | 24.2                                        | 47.5                                                  |
| 4      | Complementary DNA on pDNA/CysFI/Au | 74.0                                        | 149.3                                                 |

**Table S2:** The change in  $R_{ct}$  value for CysFI/Au, EDC/NHS activated CysFI/Au, pDNA/CysFI/Au and complementary DNA on pDNA/CysFI/Au as a function of time.

**Table S3**

| <b>No. of cycle</b> | <b>Before hybridization (<math>R_{ct}</math>, <math>\Omega</math>)</b> | <b>After hybridization (<math>R_{ct}</math>, <math>\Omega</math>)</b> | <b>% change in hybridization efficiency</b> |
|---------------------|------------------------------------------------------------------------|-----------------------------------------------------------------------|---------------------------------------------|
| 1                   | 47.28                                                                  | 148.23                                                                | 0.76                                        |
| 2                   | 47.23                                                                  | 146.07                                                                | 2.21                                        |
| 3                   | 47.02                                                                  | 143.04                                                                | 4.24                                        |
| 4                   | 46.88                                                                  | 139.89                                                                | 6.35                                        |
| 5                   | 46.54                                                                  | 136.26                                                                | 8.78                                        |
| 6                   | 46.02                                                                  | 133.45                                                                | 10.37                                       |

**Table S3:** Comparison of the change in hybridization efficiency for pDNA/CysFl/Au bioelectrode with repeated denaturation and rehybridization process.
